# Supplementary material for: Differential Effects of an Early Childhood Care Preventive Intervention Program on Behavior and Emotional Problems
Source: Springer Nature journal article supplement (doi:10.1007/s10826-023-02655-4), 2023-08-21
Supplement: MOESM1 [file 25946698]

**Appendix A.**

*Means, standard deviations, and inter-correlations between SDQ subscales (N = 627).*

| Variables/measurement occasion | Mean | SD | 1 | 2 | 3 | 4 | 5 | 6 | 7 | 8 | 9 | 10 |
| --- | --- | --- | --- | --- | --- | --- | --- | --- | --- | --- | --- | --- |
| 1. Emotional problems-pre | 0.36 | 0.43 |  |  |  |  |  |  |  |  |  |  |
|  | 0.36 | 0.42 |  |  |  |  |  |  |  |  |  |  |
| 2. Emotional problems-post | 0.22 | 0.32 | .40** |  |  |  |  |  |  |  |  |  |
|  | 0.27 | 0.38 | .56** |  |  |  |  |  |  |  |  |  |
| 3.Conduct problems-pre | 0.32 | 0.39 | .02 | .01 |  |  |  |  |  |  |  |  |
|  | 0.34 | 0.39 | .18** | .09 |  |  |  |  |  |  |  |  |
| 4. Conduct problems-post | 0.25 | 0.35 | -.13* | .04 | .61** |  |  |  |  |  |  |  |
|  | 0.30 | 0.37 | .18** | .24** | .58** |  |  |  |  |  |  |  |
| 5. Hyperactivity-pre | 0.68 | 0.57 | .14* | .16** | .54** | .39** |  |  |  |  |  |  |
|  | 0.70 | 0.58 | .10 | .08 | .47** | .38** |  |  |  |  |  |  |
| 6. Hyperactivity-post | 0.39 | 0.46 | .01 | .20** | .43** | .59** | .65** |  |  |  |  |  |
|  | 0.55 | 0.57 | .13* | .21** | .43** | .59** | .68** |  |  |  |  |  |
| 7. Peer relationship problems-pre | 0.37 | 0.44 | .36** | .22** | .25** | .16** | .28** | .27** |  |  |  |  |
|  | 0.37 | 0.43 | .34** | .23** | .19** | .23** | .18** | .25** |  |  |  |  |
| 8. Peer relationship problems-post | 0.22 | 0.33 | .23** | .48** | .20** | .33** | .29** | .36** | .57** |  |  |  |
|  | 0.26 | 0.37 | .18** | .32** | .12* | .28** | .13* | .22** | .56** |  |  |  |
| 9. Prosocial behaviors-pre | 1.35 | 0.57 | -.15* | -.02 | -.59** | -.38** | -.44** | -.35** | -.36** | -.28** |  |  |
|  | 1.35 | 0.55 | -.19** | -.14* | -.49** | -.33** | -.42** | -.35** | -.40** | -.22** |  |  |
| 10. Prosocial behaviors-post | 1.53 | 0.49 | -.00 | -.18** | -.41** | -.60** | -.37** | -.53** | -.25** | -.45** | .58** |  |
|  | 1.43 | 0.49 | -.19** | -.17** | -.38** | -.56** | -.27** | -.41** | -.28** | -.29** | .57** | 1 |

*Note*. ** = *p* < .01, * = *p* < .05. The first line represents the intervention group, and the second line represents the control group. Mean values can range from 0 to 2, with higher values indicating higher magnitudes of behavior.

*Baseline demographic and characteristics of the intervention group (IG) and control group (CG).*

|  | **IG** | **CG** | **pa.** |
| --- | --- | --- | --- |
| **Number of participants** | 301 | 326 |  |
| **Gender** (n) |  |  | .98 |
| Female | 147 | 159 |  |
| Male | 154 | 167 |  |
| **Age** (years) | 4.27 ± 0.68 | 4.26 ± 0.67 | .93 |
| **Socioeconomic status** |  |  | .60 |
| 1 | 76 | 72 |  |
| 2 | 83 | 103 |  |
| 3 | 78 | 78 |  |
| 4 | 64 | 73 |  |
| **Area** (county or city) |  |  | .53 |
| Augsburg Country | 99 | 112 |  |
| Region Aichach-Friedberg | 102 | 97 |  |
| City of Augsburg | 100 | 117 |  |
| **Origin** |  |  |  |
| German | 256 | 300 | .01 |
| Non-German | 45 | 26 |  |
| **Kindergarten Teachers** |  |  | .42 |
| Prior workshop experiences |  |  |  |
| yes | 13 | 17 |  |
| no | 11 | 9 |  |

*Note:* Values are n / mean ± SD; pa. value for differences between the study groups (Pearson chi-square for categorical variables and one-way ANOVA for continuous variables unless other noted); SES group 1–4, with rising group denoting lower socio-demographic ratios, related to municipalities or districts in which the respective daycare centers are located; Prior experiences are dichotomized values, number indicates kindergarten groups with at least one teacher (yes) or without any teachers (no) who have prior experiences with workshops on behavioral problems.
